# Supplementary material for: Amphiregulin Induces iNOS and COX-2 Expression through NF-κB and MAPK Signaling in Hepatic Inflammation
Source: Hindawi journal article supplement (doi:10.1155/2023/2364121), 2023-10-11

C57BL/6J male mice  
(n = 8)

### Normal diet protocol

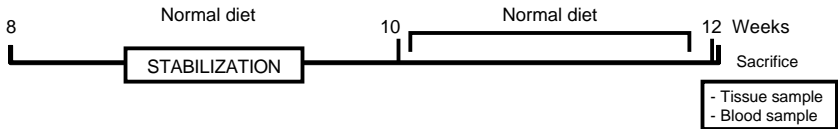

C57BL/6J male mice  
(n = 8)

### Methionine choline-deficient (MCD) diet protocol

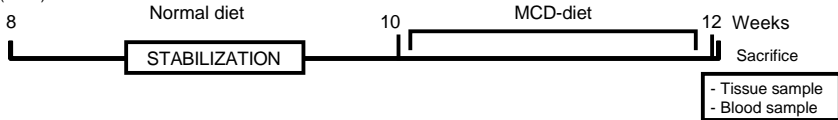

Supplement: f1 [file 2364121.f1.pdf]
