# Supplementary material for: Amphiregulin Induces iNOS and COX-2 Expression through NF-κB and MAPK Signaling in Hepatic Inflammation
Source: Hindawi journal article supplement (doi:10.1155/2023/2364121), 2023-10-11

**A**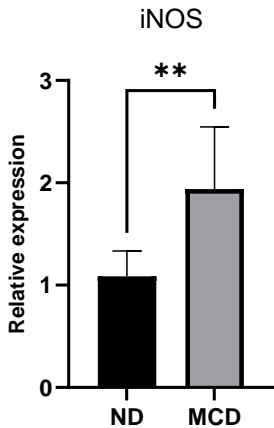**B**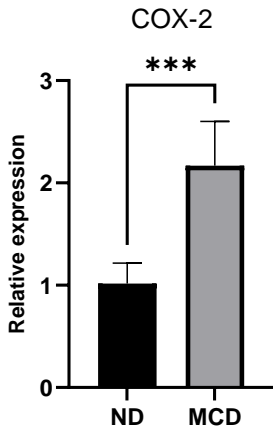

Supplement: f2 [file 2364121.f2.pdf]
